# Supplementary material for: The Mediating Roles of Medical Mistrust, Knowledge, Confidence and Complacency of Vaccines in the Pathways from Conspiracy Beliefs to Vaccine Hesitancy
Source: MDPI journal article supplement (doi:10.3390/vaccines9111342), 2021-11-17
Supplement: s1 [file s1]

## Supplementary materials: results of CFA and Questionnaires items

### *Conspiracy beliefs*

Initial Confirmatory factor analysis (CFA) showed that item A2 had loadings of less than 0.4 and was therefore, was removed from analysis. The final model indicated a good fit (RMSEA = 0.039; SRMR = 0.024; CFI = 0.984; GFI = 0.976).

Table S1. Factor correlations of CFA model

| Constructs                                 | (1)   | (2)  |
|--------------------------------------------|-------|------|
| General coronavirus conspiracy beliefs (1) | 1.00  |      |
| Conspiracy beliefs on vaccines (2)         | 0.91* | 1.00 |

\* $p < 0.01$ .

Table S2. Standardized factor loadings of CFA model with Conspiracy beliefs

| Items                                     | Factors                                   | Factor loadings | Mean  | SD   |
|-------------------------------------------|-------------------------------------------|-----------------|-------|------|
| A1                                        | General coronavirus<br>conspiracy beliefs | 0.61            | 1.22  | 0.59 |
| A3                                        |                                           | 0.57            | 1.36  | 0.78 |
| A4                                        |                                           | 0.62            | 1.32  | 0.74 |
| A5                                        |                                           | 0.62            | 1.36  | 0.76 |
| A6                                        |                                           | 0.62            | 1.35  | 0.77 |
| A7                                        |                                           | 0.67            | 1.35  | 0.73 |
| B1                                        | Conspiracy beliefs on<br>vaccines         | 0.81            | 2.27  | 1.51 |
| B2                                        |                                           | 0.81            | 2.29  | 1.45 |
| B3                                        |                                           | 0.76            | 2.41  | 1.56 |
| B4                                        |                                           | 0.86            | 2.37  | 1.52 |
| B5                                        |                                           | 0.66            | 2.15  | 1.39 |
| B6                                        |                                           | 0.77            | 2.27  | 1.53 |
| B7                                        |                                           | 0.77            | 2.24  | 1.47 |
| General coronavirus<br>conspiracy beliefs | Conspiracy beliefs                        | 0.91            | 9.27  | 3.52 |
| Conspiracy beliefs on<br>vaccines         |                                           | 0.65            | 16.00 | 8.30 |

SD: Standard deviation.

## ***Medical mistrust***

Initial CFA showed that item E2 and item F1 had loadings of less than 0.4 and were therefore, were removed from analysis. The final model indicated a good fit (RMSEA = 0.057; SRMR = 0.024; CFI = 0.970; GFI = 0.937).

Table S3. Factor correlations of CFA model

| Constructs                                    | (1)   | (2)   | (3)   | (4)   | (5)  |
|-----------------------------------------------|-------|-------|-------|-------|------|
| Disrespect from doctors (1)                   | 1.00  |       |       |       |      |
| Negative views of vaccine developers (2)      | 0.82* | 1.00  |       |       |      |
| Negative attitude to doctors (3)              | 0.79* | 0.83* | 1.00  |       |      |
| Negative attitude to medicine (4)             | 0.64* | 0.67* | 0.80* | 1.00  |      |
| Negative health care services experiences (5) | 0.56* | 0.58* | 0.70* | 0.56* | 1.00 |

\* $p < 0.01$ .

Table S4. Standardized factor loadings of CFA model with Medical mistrust

| Items                                | Factors                                   | Factor Loadings | Mean  | SD   |
|--------------------------------------|-------------------------------------------|-----------------|-------|------|
| C1                                   | Disrespect from doctors                   | 0.86            | 1.69  | 0.76 |
| C2                                   |                                           | 0.88            | 1.72  | 0.74 |
| C3                                   |                                           | 0.69            | 2.04  | 0.81 |
| C4                                   |                                           | 0.89            | 1.80  | 0.71 |
| C5                                   |                                           | 0.93            | 1.73  | 0.72 |
| C6                                   |                                           | 0.93            | 1.71  | 0.74 |
| D1                                   | Negative views of vaccine developers      | 0.90            | 1.80  | 0.78 |
| D2                                   |                                           | 0.92            | 1.75  | 0.75 |
| D3                                   |                                           | 0.93            | 1.78  | 0.75 |
| D4                                   |                                           | 0.91            | 1.77  | 0.75 |
| E1                                   | Negative attitude to doctors              | 0.76            | 2.26  | 1.29 |
| E3                                   |                                           | 0.87            | 2.26  | 1.21 |
| E4                                   |                                           | 0.89            | 2.11  | 1.18 |
| F2                                   | Negative attitude to medicine             | 0.63            | 3.05  | 1.42 |
| F3                                   |                                           | 0.86            | 2.49  | 1.32 |
| F4                                   |                                           | 0.80            | 2.56  | 1.38 |
| G1                                   | Negative health care services experiences | 0.62            | 1.68  | 0.75 |
| G2                                   |                                           | 0.78            | 1.51  | 0.70 |
| G3                                   |                                           | 0.77            | 1.69  | 0.76 |
| G4                                   |                                           | 0.78            | 1.72  | 0.74 |
| Disrespect from doctors              | Medical mistrust                          | 0.80            | 10.69 | 3.97 |
| Negative views of vaccine developers |                                           | 0.83            | 7.10  | 2.82 |
| Negative attitude to doctors         |                                           | 0.94            | 6.62  | 3.28 |

|                                              |      |      |      |
|----------------------------------------------|------|------|------|
| Negative attitude to<br>medicine             | 0.80 | 8.10 | 3.50 |
| Negative health care<br>services experiences | 0.70 | 6.14 | 2.24 |

SD: Standard deviation.

### ***Knowledge of vaccines***

Initial CFA showed that item H2 had loadings of less than 0.4 and was therefore, was removed from analysis. The final model indicated a good fit (RMSEA = 0.049; SRMR = 0.034; CFI = 0.946; GFI = 0.988).

Table S5. Factor correlations of CFA model

| Constructs                             | (1)   | (2)  |
|----------------------------------------|-------|------|
| General Knowledge about vaccines (1)   | 1.00  |      |
| Knowledge about childhood vaccines (2) | 0.85* | 1.00 |

\* $p < 0.01$ .

Table S6. Standardized factor loadings of CFA model with Knowledge of vaccines

| Items                                 | Factors                               | Factor loadings |
|---------------------------------------|---------------------------------------|-----------------|
| H1                                    | General Knowledge about<br>vaccines   | 0.67            |
| H3                                    |                                       | 0.65            |
| H4                                    |                                       | 0.68            |
| H5                                    | Knowledge about childhood<br>vaccines | 0.58            |
| H6                                    |                                       | 0.68            |
| H8                                    |                                       | 0.72            |
| H9                                    |                                       | 0.69            |
| General Knowledge<br>about vaccines   | Knowledge of vaccines                 | 0.68            |
| Knowledge about<br>childhood vaccines |                                       | 0.71            |

## *Vaccine confidence and complacency*

Initial CFA showed that item J1 had loadings of less than 0.4 and was therefore, was removed from analysis. The final model indicated a good fit (RMSEA = 0.049; SRMR = 0.034; CFI = 0.946; GFI = 0.988).

Table S7. Factor correlations of CFA model

| Constructs                       | (1)   | (2)   | (3)   | (4)  |
|----------------------------------|-------|-------|-------|------|
| Vaccine will be effective (1)    | 1.00  |       |       |      |
| Speed of vaccine development (2) | 0.72* | 1.00  |       |      |
| Collective importance (3)        | 0.92* | 0.74* | 1.00  |      |
| Side effects (4)                 | 0.82* | 0.66* | 0.84* | 1.00 |

\* $p < 0.01$ .

Table S8. Standardized factor loadings of CFA model with Vaccine confidence and complacency

| Items                         | Factors                            | Factor loadings | Mean | SD   |
|-------------------------------|------------------------------------|-----------------|------|------|
| J2                            | Efficacy of COVID-19 vaccines      | 0.69            | 2.01 | 0.59 |
| J3                            |                                    | 0.74            | 1.88 | 0.86 |
| J4                            | Speed of vaccine development       | 0.91            | 1.93 | 0.93 |
| J5                            |                                    | 0.85            | 2.03 | 0.92 |
| J6                            |                                    | 0.82            | 2.14 | 0.83 |
| J7                            | Collective importance              | 0.81            | 1.56 | 0.80 |
| J8                            |                                    | 0.75            | 1.40 | 0.75 |
| J9                            |                                    | 0.58            | 1.88 | 0.71 |
| J10                           |                                    | 0.59            | 2.34 | 0.82 |
| J11                           |                                    | 0.56            | 2.23 | 0.92 |
| J12                           | Side effects                       | 0.63            | 1.96 | 0.70 |
| J13                           |                                    | 0.74            | 1.87 | 0.71 |
| J14                           |                                    | 0.55            | 2.01 | 1.01 |
| Efficacy of COVID-19 vaccines | Vaccine confidence and complacency | 0.95            | 3.89 | 1.27 |
| Speed of vaccine development  |                                    | 0.76            | 6.10 | 2.24 |
| Collective importance         |                                    | 0.97            | 9.40 | 2.93 |
| Side effects                  |                                    | 0.87            | 5.84 | 1.87 |

SD: Standard deviation.

***Vaccine hesitancy***

CFA model indicated a good fit (RMSEA = 0.056; SRMR = 0.020; CFI = 0.988; GFI = 0.983).

Table S9. Standardized loadings based on confirmatory factor loadings

| Item | Factor loading | Mean | SD   |
|------|----------------|------|------|
| K1   | 0.76           | 1.45 | 0.81 |
| K2   | 0.75           | 1.52 | 0.90 |
| K3   | 0.81           | 1.73 | 0.85 |
| K4   | 0.82           | 1.65 | 0.83 |
| K5   | 0.79           | 1.73 | 0.81 |
| K6   | 0.76           | 1.83 | 0.72 |
| K7   | 0.42           | 1.54 | 0.89 |

Standardized item loadings for a single factor, SD: Standard deviation.

Table S10. Endorsement of vaccine hesitancy items

| Items                                                                         | Response                                  | <i>n</i> | %    |
|-------------------------------------------------------------------------------|-------------------------------------------|----------|------|
| K1. Would you take a COVID-19 vaccine (approved for use in China) if offered? | Definitely                                | 712      | 70.1 |
|                                                                               | Probably                                  | 195      | 19.2 |
|                                                                               | I may or I may not                        | 76       | 7.5  |
|                                                                               | Probably not                              | 21       | 2.1  |
|                                                                               | Definitely not                            | 11       | 1.1  |
| K2. If there is a COVID-19 vaccine available,                                 | I will want to get it as soon as possible | 702      | 69.2 |
|                                                                               | I will take it when offered               | 157      | 15.5 |
|                                                                               | I'm not sure what I will do               | 117      | 11.5 |
|                                                                               | I will put off (delay) getting it         | 23       | 2.3  |
|                                                                               | I will refuse to get it                   | 16       | 1.6  |
| K3. I would describe my attitude towards receiving a COVID-19 vaccine as:     | Very keen                                 | 477      | 47.0 |
|                                                                               | Pretty positive                           | 381      | 37.5 |
|                                                                               | Neutral                                   | 123      | 12.1 |
|                                                                               | Quite uneasy                              | 21       | 2.1  |
|                                                                               | Against it                                | 13       | 1.3  |
| K4. If a COVID-19 vaccine was available at my local pharmacy, I would:        | Get it as soon as possible                | 532      | 52.4 |
|                                                                               | Get it when I have time                   | 353      | 34.8 |
|                                                                               | Delay getting it                          | 94       | 9.3  |

|                                                                                       |                                                 |     |      |
|---------------------------------------------------------------------------------------|-------------------------------------------------|-----|------|
| K5. If my family or friends were thinking of getting a COVID-19 vaccination, I would: | Avoid getting it for as long as possible        | 26  | 2.6  |
|                                                                                       | Never get it                                    | 10  | 1.0  |
|                                                                                       | Strongly encourage them                         | 428 | 42.2 |
|                                                                                       | Encourage them                                  | 460 | 45.3 |
|                                                                                       | Not say anything to them about it               | 92  | 9.1  |
|                                                                                       | Ask them to delay getting the vaccination       | 22  | 2.2  |
|                                                                                       | Suggest that they do not get the vaccination    | 13  | 1.3  |
|                                                                                       | Eager to get a COVID-19 vaccine                 | 309 | 30.4 |
| K6. I would describe myself as:                                                       | Willing to get the COVID-19 vaccine             | 607 | 59.8 |
|                                                                                       | Not bothered about getting the COVID-19 vaccine | 71  | 7.0  |
|                                                                                       | Unwilling to get the COVID-19 vaccine           | 17  | 1.7  |
|                                                                                       | Anti-vaccination for COVID-19                   | 11  | 1.1  |
| K7. Taking a COVID-19 vaccination is:                                                 | Really important                                | 540 | 53.2 |
|                                                                                       | Important                                       | 408 | 40.2 |
|                                                                                       | Neither important nor unimportant               | 46  | 4.5  |
|                                                                                       | Unimportant                                     | 13  | 1.3  |
|                                                                                       | Really unimportant                              | 8   | 0.8  |

---

Table S11. Endorsement of general coronavirus conspiracy beliefs items

| Items                                                                                            | Do not agree | Agree a little | Agree moderately | Agree a lot | Agree completely |
|--------------------------------------------------------------------------------------------------|--------------|----------------|------------------|-------------|------------------|
| A1. The virus is a hoax.                                                                         | 867 (85.4%)  | 92 (9.1%)      | 43 (4.2%)        | 11 (1.1%)   | 2 (0.2%)         |
| A2. The virus is manmade.                                                                        | 870 (85.7%)  | 46 (4.5%)      | 51 (5.0%)        | 22 (2.2%)   | 26 (2.6%)        |
| A3. The spread of the virus is a deliberate attempt to reduce the size of the global population. | 780 (76.8%)  | 150 (14.8%)    | 47 (4.6%)        | 29 (2.9%)   | 9 (0.9%)         |
| A4. The spread of the virus is a deliberate attempt by governments to gain political control.    | 804 (79.2%)  | 136 (13.4%)    | 45 (4.4%)        | 20 (2.0%)   | 10 (1.0%)        |
| A5. The spread of the virus is a deliberate attempt by a group of powerful people to make money. | 781 (76.9%)  | 147 (13.8%)    | 52 (5.1%)        | 28 (2.8%)   | 7 (0.7%)         |
| A6. The spread of the virus is a deliberate attempt by one nation to destabilize another.        | 787 (77.5%)  | 140 (13.8%)    | 52 (5.1%)        | 28 (2.8%)   | 8 (0.8%)         |
| A7. The spread of the virus is a deliberate attempt by global companies to take control.         | 779 (76.7%)  | 149 (14.7%)    | 58 (5.7%)        | 25 (2.5%)   | 4 (0.4%)         |

Table S12. Endorsement of vaccine conspiracy beliefs items

| Items                                                                          | Strongly disagree | Disagree    | Somewhat disagree | Neutral   | Somewhat agree | Agree     | Strongly agree |
|--------------------------------------------------------------------------------|-------------------|-------------|-------------------|-----------|----------------|-----------|----------------|
| B1. Vaccine safety data are often fabricated (made up).                        | 361 (35.6%)       | 392 (38.6%) | 95 (9.4%)         | 56 (5.5%) | 46 (4.5%)      | 38 (3.7%) | 27 (2.7%)      |
| B2. Immunizing children is harmful and this fact is covered up.                | 329 (32.4%)       | 411 (40.5%) | 105 (10.3%)       | 65 (6.4%) | 46 (4.5%)      | 40 (3.9%) | 19 (1.9%)      |
| B3. Pharmaceutical companies cover up the dangers of vaccines.                 | 327 (32.2%)       | 375 (36.9%) | 119 (11.7%)       | 63 (6.2%) | 56 (5.5%)      | 49 (4.8%) | 26 (2.6%)      |
| B4. People are deceived about the effectiveness of vaccines.                   | 310 (30.5%)       | 417 (41.1%) | 109 (10.7%)       | 57 (5.6%) | 47 (4.6%)      | 50 (4.9%) | 25 (2.5%)      |
| B5. Vaccine effectiveness data are often fabricated (made up).                 | 346 (34.1%)       | 474 (46.7%) | 62 (6.1%)         | 35 (3.4%) | 43 (4.2%)      | 38 (3.7%) | 17 (1.7%)      |
| B6. People are deceived about vaccine safety.                                  | 394 (38.8%)       | 322 (31.7%) | 138 (13.6%)       | 51 (5.0%) | 47 (4.6%)      | 33 (3.3%) | 30 (3.0%)      |
| B7. The government is trying to cover up the link between vaccines and autism. | 382 (37.6%)       | 343 (33.8%) | 132 (13.0%)       | 59 (5.8%) | 40 (3.9%)      | 37 (3.6%) | 22 (2.2%)      |



Table S13. Endorsement of Oxford trust in doctors and developers items

| Items                                                    | Disagree completely | Disagree    | Agree       | Agree completely |
|----------------------------------------------------------|---------------------|-------------|-------------|------------------|
| C1. They do not really care about me.                    | 464 (45.7%)         | 428 (42.2%) | 93 (9.2%)   | 30 (3.0%)        |
| C2. They have little respect for me.                     | 437 (43.1%)         | 456 (44.9%) | 96 (9.5%)   | 26 (2.6%)        |
| C3. They have no idea what my life is like.              | 282 (27.8%)         | 438 (43.2%) | 266 (26.2%) | 29 (2.9%)        |
| C4. They often make mistakes.                            | 356 (35.1%)         | 537 (52.9%) | 96 (9.5%)   | 26 (2.6%)        |
| C5. They are in it for the money.                        | 409 (40.3%)         | 493 (48.6%) | 86 (8.5%)   | 27 (2.7%)        |
| C6. I do not trust doctors.                              | 441 (43.4%)         | 455 (44.8%) | 92 (9.1%)   | 27 (2.7%)        |
| D1. I do not trust the vaccine developers.               | 389 (38.3%)         | 477 (47.0%) | 110 (10.8%) | 39 (3.8%)        |
| D2. They just want to make money.                        | 409 (40.3%)         | 479 (47.2%) | 97 (9.6%)   | 30 (3.0%)        |
| D3. They do not care about helping people.               | 389 (38.3%)         | 490 (48.3%) | 106 (10.4%) | 30 (3.0%)        |
| D4. They do not properly check that the vaccine is safe. | 395 (38.9%)         | 491 (48.4%) | 98 (9.7%)   | 31 (3.1%)        |

Table S14. Endorsement of attitudes to doctors and medicine items

| Items                                                                                      | Strongly disagree | Disagree    | Tend to disagree | Tend to agree | Agree       | Strongly agree |
|--------------------------------------------------------------------------------------------|-------------------|-------------|------------------|---------------|-------------|----------------|
| E1. Doctors blame their patients if their treatment doesn't work.                          | 311 (30.6%)       | 412 (40.6%) | 118 (11.6%)      | 101 (10.0%)   | 37 (3.6%)   | 36 (3.5%)      |
| E2. No two doctors will agree with what is wrong with someone.                             | 167 (16.5%)       | 404 (39.8%) | 234 (23.1%)      | 76 (7.5%)     | 78 (7.7%)   | 56 (5.5%)      |
| E3. Doctors are too ready to solve patients' problems by prescribing tranquillizers.       | 293 (28.9%)       | 408 (40.2%) | 156 (15.4%)      | 105 (10.3%)   | 24 (2.4%)   | 29 (2.9%)      |
| E4. I don't like medical people.                                                           | 350 (34.5%)       | 414 (40.8%) | 118 (11.6%)      | 85 (8.4%)     | 23 (2.3%)   | 25 (2.5%)      |
| F1. Medicines can do as much harm as good.                                                 | 226 (26.2%)       | 463 (45.6%) | 151 (14.9%)      | 47 (4.6%)     | 35 (3.4%)   | 53 (5.2%)      |
| F2. Many medicines are just placebos or sugar pills.                                       | 146 (14.4%)       | 280 (27.6%) | 193 (19.0%)      | 224 (22.1%)   | 118 (11.6%) | 54 (5.3%)      |
| F3. Often the only purpose of tests is to make a doctor feel less anxious.                 | 240 (23.6%)       | 383 (37.7%) | 176 (17.3%)      | 124 (12.2%)   | 52 (5.1%)   | 40 (3.9%)      |
| F4. Most tests and investigations are done routinely rather than for a particular purpose. | 243 (23.9%)       | 364 (35.9%) | 159 (15.7%)      | 142 (14.0%)   | 62 (6.1%)   | 45 (4.4%)      |

Table S15. Endorsement of negative healthcare services experiences items

| Items                                         | No          | Maybe       | Yes         |
|-----------------------------------------------|-------------|-------------|-------------|
| G1. Staff have gone out of their way to help. | 498 (49.1%) | 344 (33.9%) | 173 (17.0%) |
| G2. Received harmful care.                    | 615 (60.6%) | 280 (27.6%) | 120 (11.8%) |
| G3. Family received harmful care.             | 615 (60.6%) | 297 (29.3%) | 103 (10.1%) |
| G4. The NHS treats your community badly.      | 641 (63.2%) | 284 (28.0%) | 90 (8.9%)   |

Table S16. Endorsement of knowledge of vaccines items

| Items                                                                                                                 | Incorrect   | Correct     |
|-----------------------------------------------------------------------------------------------------------------------|-------------|-------------|
| H1. Vaccines are superfluous (unnecessary), as diseases can be treated (e.g., with antibiotics).                      | 885 (87.2%) | 130 (12.8%) |
| H2. Without broadly applied vaccine programmers, smallpox would still exist.                                          | 191 (18.8%) | 824 (81.2%) |
| H3. The efficacy of vaccines has been proven.                                                                         | 184 (18.1%) | 831 (81.9%) |
| H4. The doses of the vaccines are not dangerous for humans.                                                           | 221 (21.8%) | 794 (78.2%) |
| H5. Children would be more resistant if they were not always vaccinated against all diseases.                         | 834 (82.2%) | 181 (17.8%) |
| H6. Diseases like autism, multiple sclerosis, and diabetes might be triggered through vaccination.                    | 188 (18.5%) | 827 (81.5%) |
| H7. The immune system of children is not overloaded through many vaccinations.                                        | 529 (52.1%) | 486 (47.9%) |
| H8. Many vaccinations are administered too early, so that the body's own immune system has no possibility to develop. | 694 (68.4%) | 321 (31.6%) |
| H9. Vaccinations increase the occurrence of allergies.                                                                | 665 (65.5%) | 350 (34.5%) |

Table S17. Endorsement of vaccine confidence and complacency items

| Items                                                                        | Response                                     | <i>n</i> | %    |
|------------------------------------------------------------------------------|----------------------------------------------|----------|------|
| J1. Do you think you will be infected with COVID-19 over the next 12 months? | Definitely                                   | 529      | 52.1 |
|                                                                              | Probably                                     | 269      | 26.5 |
|                                                                              | Possibly                                     | 133      | 13.1 |
|                                                                              | Probably not                                 | 47       | 4.6  |
|                                                                              | Definitely not                               | 37       | 3.6  |
| J2. The COVID-19 vaccine is likely to:                                       | Work for almost everyone                     | 136      | 13.4 |
|                                                                              | Work for most people                         | 762      | 75.1 |
|                                                                              | I am unsure how many people it will work for | 94       | 9.3  |
|                                                                              | Not work for most people                     | 17       | 1.7  |
|                                                                              | Not work for anyone                          | 6        | 0.6  |
| J3. The COVID-19 vaccine is likely to:                                       | Definitely work for me                       | 362      | 35.7 |
|                                                                              | Probably work for me                         | 478      | 47.1 |
|                                                                              | May or may not work for me                   | 129      | 12.7 |
|                                                                              | Probably not work for me                     | 28       | 2.8  |
|                                                                              | Definitely not work for me                   | 18       | 1.8  |
| J4. The speed of developing and testing the vaccine means it will be:        | Really good                                  | 386      | 38.0 |
|                                                                              | Good                                         | 383      | 37.7 |
|                                                                              | Will not affect how good or bad it is        | 195      | 19.2 |

|                                                                       |                                                           |     |      |
|-----------------------------------------------------------------------|-----------------------------------------------------------|-----|------|
| J5. The speed of developing and testing the vaccine means it will be: | Bad                                                       | 34  | 3.3  |
|                                                                       | Really bad                                                | 17  | 1.7  |
|                                                                       | Really safe                                               | 322 | 31.7 |
|                                                                       | Safe                                                      | 419 | 41.3 |
|                                                                       | It will not affect how safe it is                         | 210 | 20.7 |
|                                                                       | Unsafe                                                    | 50  | 4.9  |
| J6. Getting the vaccine is a sign of:                                 | Really unsafe                                             | 14  | 1.4  |
|                                                                       | Great personal strength                                   | 237 | 23.3 |
|                                                                       | Personal strength                                         | 436 | 43.0 |
|                                                                       | Not a sign of personal strength or weakness               | 315 | 31.0 |
|                                                                       | Personal weakness                                         | 16  | 1.6  |
|                                                                       | Great personal weakness                                   | 11  | 1.1  |
| J7. If I get the COVID-19 vaccine it will be:                         | Really helpful for the community around me                | 578 | 56.9 |
|                                                                       | Helpful for the community around me                       | 360 | 35.5 |
|                                                                       | Neither helpful nor unhelpful for the community around me | 43  | 4.2  |
|                                                                       | Unhelpful for the community around me                     | 16  | 1.6  |
|                                                                       | Really unhelpful for the community around me              | 18  | 1.8  |
|                                                                       | Save a large number of lives                              | 717 | 70.6 |
| J8. If individuals like me get the COVID-19 vaccine it will:          | Save some lives                                           | 234 | 23.1 |
|                                                                       | Have no impact                                            | 27  | 2.7  |

|                                                   |                                                                  |     |      |
|---------------------------------------------------|------------------------------------------------------------------|-----|------|
| J9. If many people do not get the vaccine this:   | Lead to more deaths                                              | 28  | 2.8  |
|                                                   | Lead to a large number of deaths                                 | 9   | 0.9  |
|                                                   | Will be dangerous                                                | 264 | 26.0 |
|                                                   | May be dangerous                                                 | 656 | 64.6 |
|                                                   | Will have no consequences at all                                 | 61  | 6.0  |
|                                                   | May be good                                                      | 21  | 2.1  |
|                                                   | Will be good                                                     | 13  | 1.3  |
| J10. The COVID-19 vaccine will:                   | Greatly strengthen my immune system                              | 148 | 14.6 |
|                                                   | Strengthen my immune system                                      | 442 | 43.5 |
|                                                   | It will neither strengthen nor weaken my immune system           | 369 | 36.4 |
|                                                   | Weaken my immune system                                          | 45  | 4.4  |
|                                                   | Greatly weaken my immune system                                  | 11  | 1.1  |
| J11. Taking the COVID-19 vaccine:                 | Will give me complete freedom to get on with life just as before | 270 | 26.6 |
|                                                   | Will give me greater freedom                                     | 299 | 29.5 |
|                                                   | Will have no effect on my freedom                                | 406 | 40.0 |
|                                                   | Will restrict my freedom                                         | 27  | 2.7  |
|                                                   | Will completely restrict my freedom to get on with life          | 13  | 1.3  |
|                                                   | Hardly noticeable                                                | 207 | 20.4 |
| J12. I expect that receiving the vaccine will be: | A little unpleasant                                              | 689 | 67.9 |
|                                                   | Moderately unpleasant                                            | 82  | 8.1  |

|                                                                           |                   |     |      |
|---------------------------------------------------------------------------|-------------------|-----|------|
| J13. The side effects for people of getting the COVID-19 vaccine will be: | Painful           | 24  | 2.4  |
|                                                                           | Extremely painful | 13  | 1.3  |
|                                                                           | None              | 272 | 26.8 |
|                                                                           | Mild              | 651 | 64.1 |
|                                                                           | Moderate          | 57  | 5.6  |
|                                                                           | Significant       | 23  | 2.3  |
| J14. Taking a new COVID-19 vaccine will make me feel like a guinea pig:   | Life-threatening  | 12  | 1.2  |
|                                                                           | Do not agree      | 419 | 41.3 |
|                                                                           | Agree a little    | 246 | 24.2 |
|                                                                           | Agree moderately  | 287 | 28.3 |
|                                                                           | Agree a lot       | 49  | 4.8  |
|                                                                           | Completely agree  | 14  | 1.4  |

---
